# Supplementary figures and images for: Photovoltaic action of conjugated polymer/fullerene bulk heterojunction solar cells using novel PPE-PPV copolymers
Source: Royal Society of Chemistry journal article supplement (doi:10.1039/b407794f), 2004-01-01

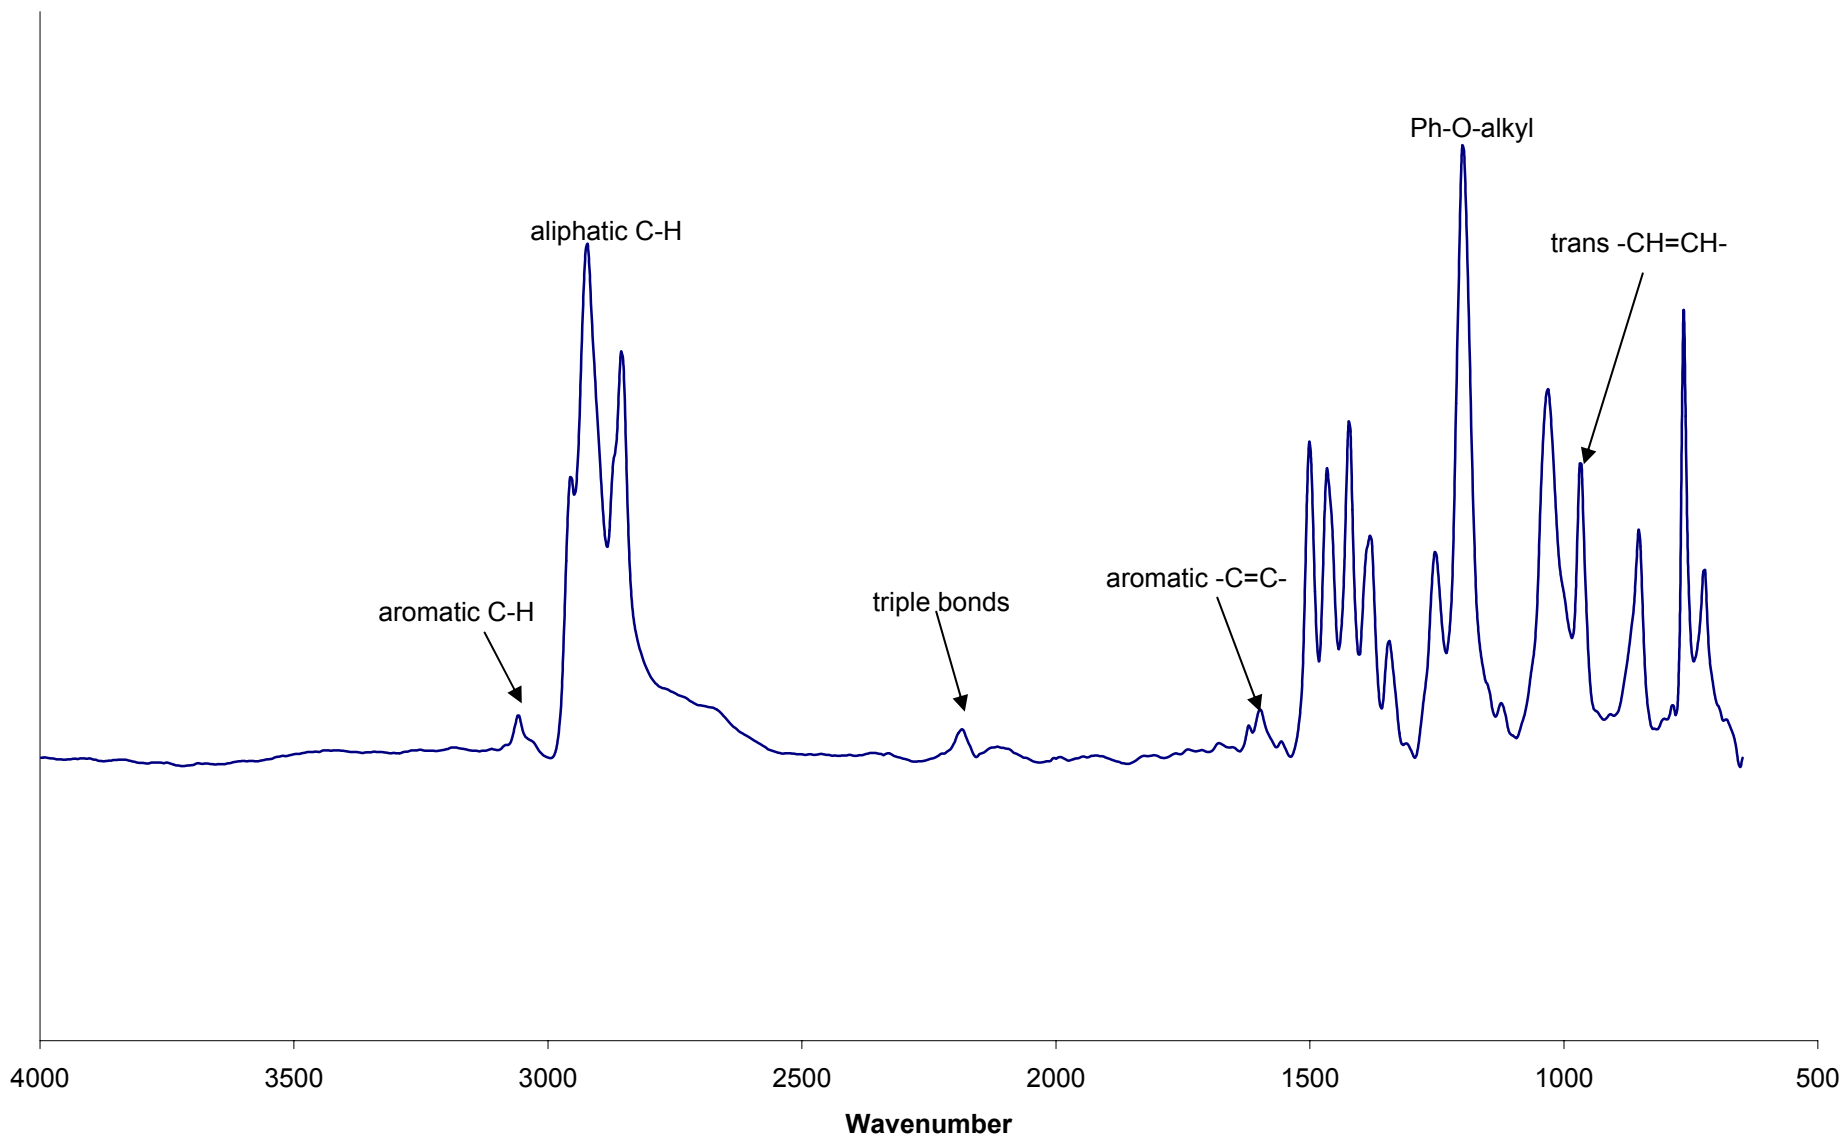

Supplement: b407794f.pdf [file b407794f.pdf]
